# Supplementary material for: Temperature Dependence of Spin–Phonon Coupling in [VO(acac)2]: A Computational and Spectroscopic Study
Source: PubMed Central journal article supplement (PMC8521520; doi:10.1021/acs.jpcc.1c06916), 2021-09-30
Supplement: jp1c06916_si_001.pdf [file jp1c06916_si_001.pdf]

---

# The Temperature Dependence of Spin-Phonon Coupling in [VO(acac)<sub>2</sub>]: a Computational and Spectroscopic Study

Andrea Albino<sup>a</sup>, Stefano Benci<sup>a,b</sup>, Matteo Atzori<sup>c</sup>, Laura Chelazzi<sup>d</sup>, Samuele Ciattini<sup>d</sup>,  
Andrea Taschin<sup>b</sup>, Paolo Bartolini<sup>b</sup>, Alessandro Lunghi<sup>e</sup>, Roberto Righini<sup>b</sup>, Renato Torre\*<sup>f,b</sup>,  
Federico Totti\*<sup>a</sup> and Roberta Sessoli,<sup>a</sup>

<sup>a</sup> *Dipartimento di Chimica "Ugo Schiff" & INSTM RU, Università degli Studi di Firenze, Via della Lastruccia 3, Sesto Fiorentino (FI) 50019, Italy*

<sup>b</sup> *European Laboratory for Non-Linear Spectroscopy (LENS), Università degli Studi di Firenze, Italy*

<sup>c</sup> *Laboratoire National des Champs Magnétiques Intenses (LNCMI), Univ. Grenoble Alpes, INSA Toulouse, Univ. Toulouse Paul Sabatier, EMFL, CNRS, F38043 Grenoble, France.*

<sup>d</sup> *Dipartimento di Chimica "Ugo Schiff" & Center of Crystallography, Università degli Studi di Firenze, Via della Lastruccia 3, Sesto Fiorentino (FI) 50019, Italy*

<sup>e</sup> *School of Physics, CRANN and AMBER, Trinity College, Dublin 2, Ireland*

<sup>f</sup> *Dipartimento di Fisica ed Astronomia, Università degli Studi di Firenze, Via G. Sansone 1, Sesto Fiorentino (FI) 50019, Italy*

## Supporting Information

TAB. S 1 Summary of X-ray Crystallographic Data for [VO(acac)<sub>2</sub>] at 100 K and 300 K

| Property                         | <b>100K</b>                                      | <b>1300K</b>                                     |
|----------------------------------|--------------------------------------------------|--------------------------------------------------|
| empirical formula                | C <sub>10</sub> H <sub>14</sub> O <sub>5</sub> V | C <sub>10</sub> H <sub>14</sub> O <sub>5</sub> V |
| formula weight                   | 265.15                                           | 265.15                                           |
| crystal system                   | triclinic                                        | triclinic                                        |
| space group                      | P-1                                              | P-1                                              |
| <i>a</i> , Å                     | 7.3005(12)                                       | 7.5132(5)                                        |
| <i>b</i> , Å                     | 8.1172(13)                                       | 8.2015(6)                                        |
| <i>c</i> , Å                     | 11.1782(18)                                      | 11.2206(8)                                       |
| $\alpha$ , deg                   | 72.901(7)                                        | 73.174(4)                                        |
| $\beta$ , deg                    | 72.282(7)                                        | 71.476(4)                                        |
| $\gamma$ , deg                   | 67.064(6)                                        | 66.718(4)                                        |
| volume, Å <sup>3</sup>           | 569.37(16)                                       | 591.45(8)                                        |
| <i>Z</i>                         | 2                                                | 2                                                |
| <i>T</i> , K                     | 100(2)                                           | 300(2)                                           |
| $\rho$ (calc), Mg/m <sup>3</sup> | 1.547                                            | 1.489                                            |
| $\mu$ , mm <sup>-1</sup>         | 7.351                                            | 7.077                                            |
| $\theta$ range, deg              | 4.24–68.42                                       | 4.24–68.32                                       |
| goodness of fit, Goof            | 1.191                                            | 1.139                                            |
| R1 <sup>a</sup>                  | 0.0563                                           | 0.0707                                           |
| wR2 <sup>b</sup>                 | 0.1685                                           | 0.1990                                           |

$$^a R1 = \frac{\sum ||F_o| - |F_c||}{\sum |F_o|},$$

$$^b wR2 = \left[ \frac{\sum [w(F_o^2 - F_c^2)]^2}{\sum w(F_o^2)^2} \right]^{1/2},$$

$$\text{where } w = 1/[\sigma^2(F_o^2) + (aP)^2 + bP],$$

$$\text{and } P = [\max(F_o^2, 0) + 2F_c^2]/3.$$

## Convergence test: DFT Parameters vs. PW cutoff

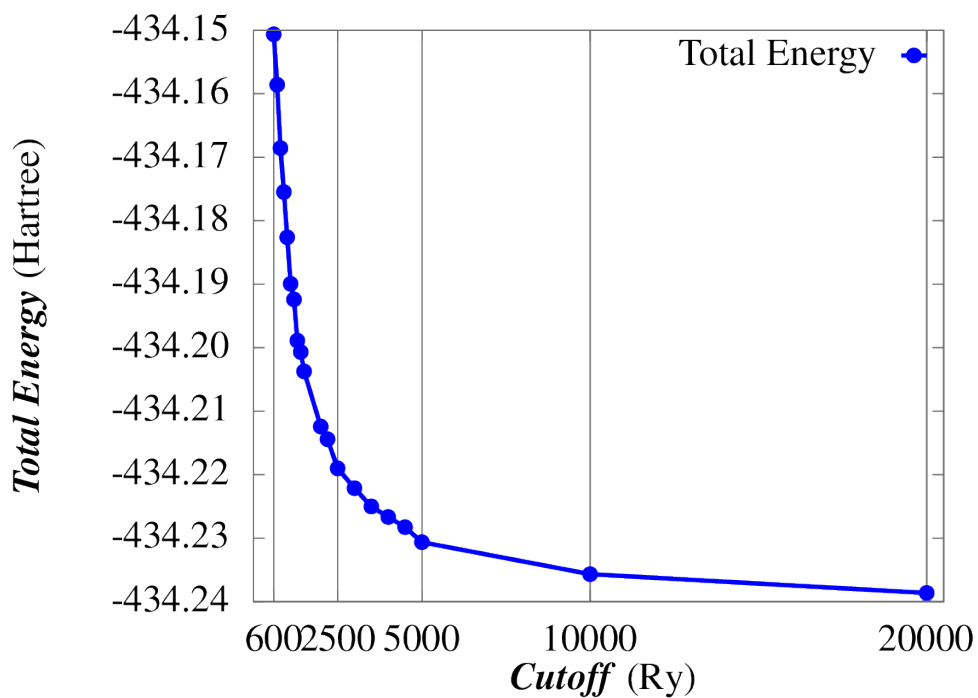

FIG. S 1 Plot of DFT Total Energy calculation results as a function of plane waves cutoff.

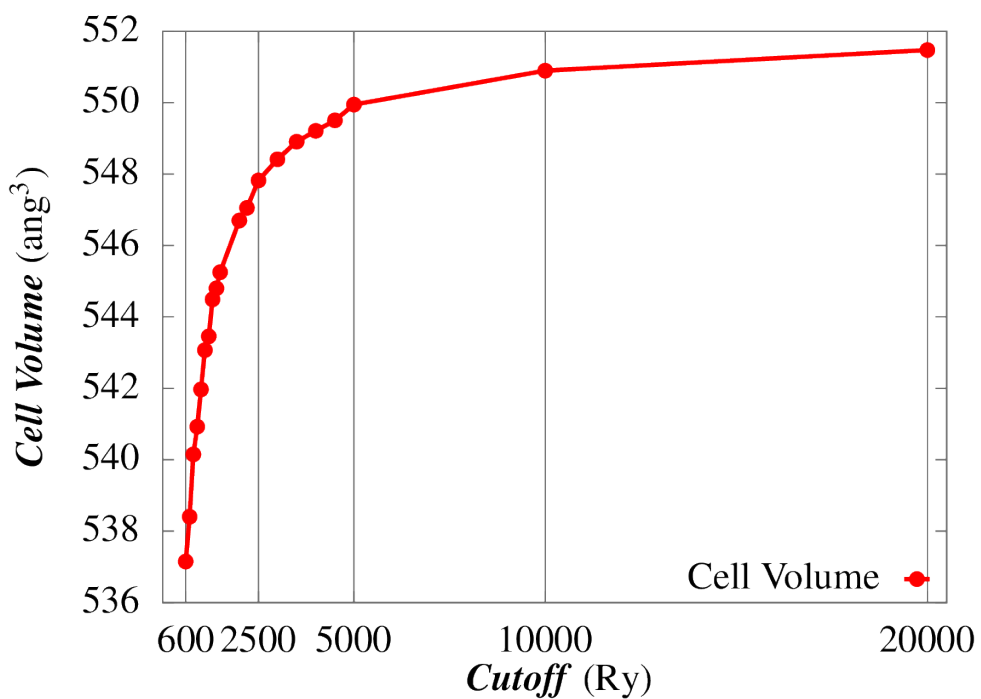

FIG. S 2 Plot of DFT Cell Volume calculation results as a function of plane waves cutoff.

## VO(acac)<sub>2</sub> Cartesian Derivatives Comparison

TAB. S 2 The derivatives  $\frac{\partial g_{XX}}{\partial r_\alpha}$  of the diagonal  $g_{XX}$  element of the Landè factor are displayed for the Vanadium(IV) metal center and for the five peripheral Oxygen atoms.  $\alpha$  index runs over the  $3N$  cartesian coordinates  $r$  and  $N$  is the number of atoms in the molecule.

| $\alpha$ | $r_\alpha$      | 0K cell opt     | 100K geo opt    | 300K geo opt    |
|----------|-----------------|-----------------|-----------------|-----------------|
| 1        | $x_V$           | -1.46203088E-02 | -1.21445060E-02 | -1.24181770E-02 |
| 2        | $y_V$           | -2.76838131E-02 | -2.74094734E-02 | -2.87556536E-02 |
| 3        | $z_V$           | 2.89104618E-02  | 3.22515853E-02  | 3.09840161E-02  |
| 4        | $x_O^{acac}$    | -1.47276092E-02 | -1.45998057E-02 | -3.69157759E-03 |
| 5        | $y_O^{acac}$    | -1.38264429E-03 | -1.40079285E-03 | -3.85635463E-03 |
| 6        | $z_O^{acac}$    | 6.90926192E-03  | 6.49499521E-03  | -1.70013849E-02 |
| 7        | $x_O^{acac}$    | -4.17997874E-03 | -3.37451557E-03 | -8.73978715E-03 |
| 8        | $y_O^{acac}$    | -3.75643442E-03 | -4.22891276E-03 | 5.78277512E-03  |
| 9        | $z_O^{acac}$    | -1.66153368E-02 | -1.73409153E-02 | -3.46001441E-04 |
| 10       | $x_O^{acac}$    | -7.58819887E-03 | -9.13951546E-03 | 1.00584226E-02  |
| 11       | $y_O^{acac}$    | 6.16217591E-03  | 5.65277738E-03  | 1.76612455E-02  |
| 12       | $z_O^{acac}$    | -4.80698800E-04 | -3.53019772E-04 | -1.99710838E-02 |
| 13       | $x_O^{acac}$    | 1.06107909E-02  | 1.00607947E-02  | -1.46265775E-02 |
| 14       | $y_O^{acac}$    | 1.71720870E-02  | 1.74093265E-02  | -1.13889459E-03 |
| 15       | $z_O^{acac}$    | -1.91540383E-02 | -1.99739151E-02 | 6.97050570E-03  |
| 16       | $x_O^{vanadyl}$ | 2.86301915E-02  | 2.74688937E-02  | 2.78202221E-02  |
| 17       | $y_O^{vanadyl}$ | 4.29155584E-03  | 5.04433736E-03  | 5.06365532E-03  |
| 18       | $z_O^{vanadyl}$ | -3.01737781E-03 | -3.89244477E-03 | -3.57094430E-03 |

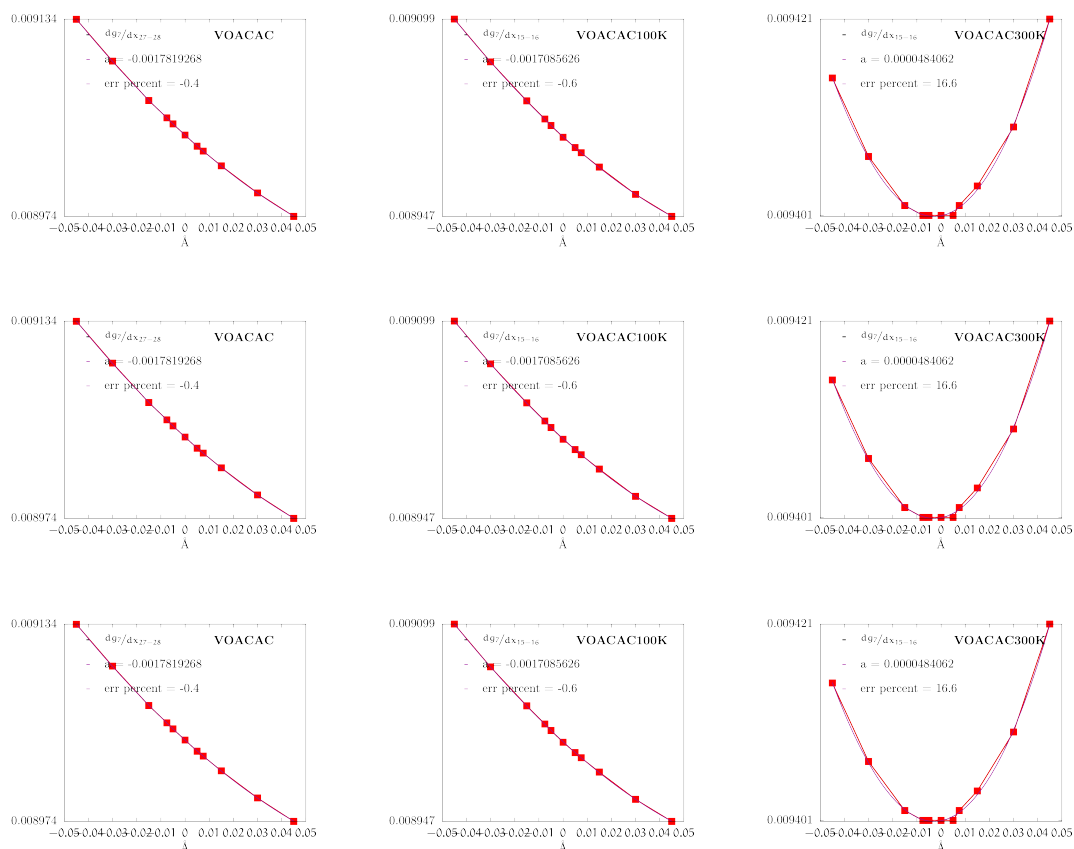

FIG. S 3 Derivatives may vary (not dramatically) between 0K-100K-300K structures.

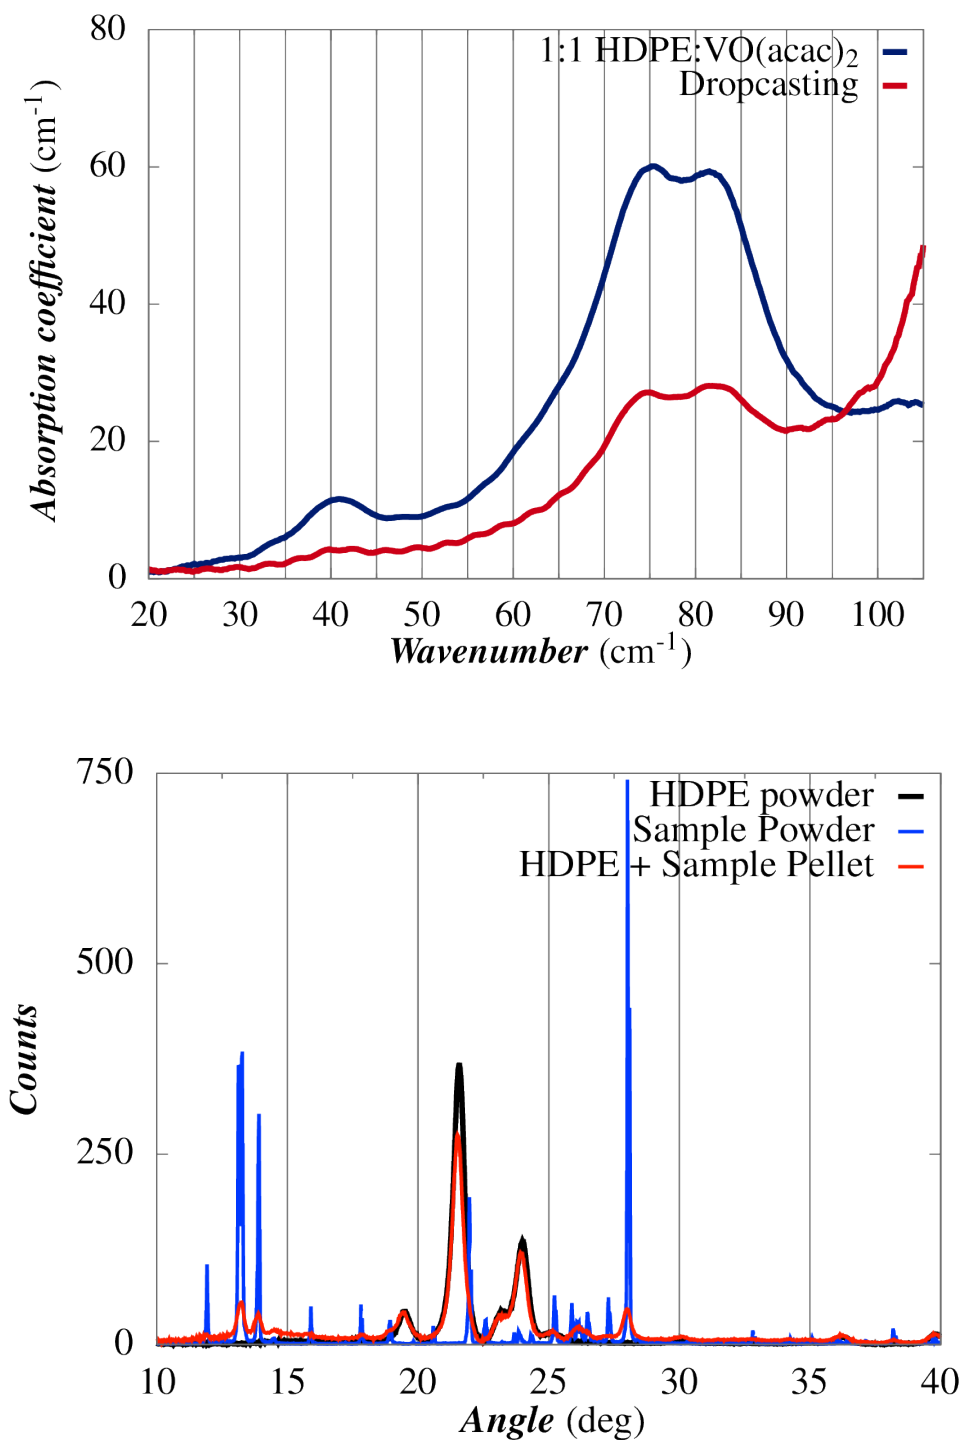

FIG. S 4 Top: comparison of (**1<sub>a</sub>**) and (**1<sub>b</sub>**). No significant effects are originated by the preparation method of each sample, confirming that the applied pressure, necessary to make the pellet, does not change the structure of [VO(acac)<sub>2</sub>]. Bottom: powders X-Ray diffraction analysis. Comparison among pure HDPE powder (black line), pure [VO(acac)<sub>2</sub>] powder (green line) and the pellet of the sample dispersed in HDPE.

TAB. S 3 Full spectral data of **10K.cellopt**, **1100K.opt**, **1300K.opt**.  $\omega$  is the mode frequency,  $i$  shows the presence (RA) or absence (RA) of inversion point in the mode simmetry, IR int. represents the IR intensity and Sp-Ph represents the spin-phonon coupling coefficient magnitude.

| <b>10K.cellopt</b>           |         |         |             | <b>1100K.opt</b>             |     |         |       | <b>1300K.opt</b>             |          |         |         |    |             |          |
|------------------------------|---------|---------|-------------|------------------------------|-----|---------|-------|------------------------------|----------|---------|---------|----|-------------|----------|
| $\omega$ (cm <sup>-1</sup> ) | $i$     | IR int. | Sp-Ph       | $\omega$ (cm <sup>-1</sup> ) | $i$ | IR int. | Sp-Ph | $\omega$ (cm <sup>-1</sup> ) | $i$      | IR int. | Sp-Ph   |    |             |          |
| 4                            | 43.313  | RA      | 8.04759e-08 | 1.130E-7                     | 4   | 42.411  | IR    | 0.109243                     | 3.905E-7 | 4       | 38.137  | IR | 0.12052     | 3.787E-7 |
| 5                            | 50.872  | RA      | 3.31624e-08 | 1.648E-7                     | 5   | 46.320  | RA    | 4.77063e-09                  | 1.430E-7 | 5       | 40.497  | RA | 1.8248e-08  | 2.427E-8 |
| 6                            | 55.323  | IR      | 0.111876    | 2.331E-7                     | 6   | 48.492  | RA    | 2.55834e-08                  | 3.037E-7 | 6       | 43.222  | RA | 4.52691e-08 | 3.545E-7 |
| 7                            | 63.349  | RA      | 9.19853e-08 | 6.260E-7                     | 7   | 57.788  | RA    | 7.80443e-09                  | 7.608E-7 | 7       | 53.353  | RA | 1.20301e-08 | 5.580E-7 |
| 8                            | 73.267  | IR      | 0.183217    | 4.399E-7                     | 8   | 66.991  | RA    | 6.69308e-09                  | 3.717E-7 | 8       | 61.592  | RA | 1.80185e-08 | 3.906E-7 |
| 9                            | 75.290  | RA      | 5.41484e-08 | 2.357E-7                     | 9   | 69.518  | IR    | 0.137836                     | 8.549E-7 | 9       | 64.171  | IR | 0.15482     | 8.199E-7 |
| 10                           | 81.218  | RA      | 2.52218e-07 | 3.927E-7                     | 10  | 76.013  | IR    | 0.0503467                    | 4.069E-7 | 10      | 69.467  | IR | 0.0260264   | 2.448E-7 |
| 11                           | 83.461  | IR      | 0.0793074   | 2.453E-7                     | 11  | 79.998  | RA    | 2.59466e-09                  | 9.584E-8 | 11      | 73.577  | RA | 4.64896e-09 | 1.711E-7 |
| 12                           | 98.285  | RA      | 6.83067e-07 | 4.581E-7                     | 12  | 94.864  | IR    | 0.0155736                    | 6.695E-7 | 12      | 86.907  | IR | 0.3602      | 6.289E-7 |
| 13                           | 99.240  | IR      | 0.160532    | 3.330E-7                     | 13  | 100.610 | RA    | 7.95437e-08                  | 9.038E-7 | 13      | 89.691  | RA | 5.7009e-08  | 6.472E-7 |
| 14                           | 111.392 | RA      | 1.4703e-07  | 2.764E-7                     | 14  | 104.128 | RA    | 4.84387e-09                  | 4.613E-7 | 14      | 96.560  | RA | 2.50481e-09 | 4.950E-7 |
| 15                           | 112.346 | IR      | 0.142351    | 5.968E-7                     | 15  | 108.685 | IR    | 0.027687                     | 3.620E-7 | 15      | 102.072 | IR | 0.0390919   | 2.255E-7 |
| 16                           | 114.618 | RA      | 1.68674e-07 | 2.050E-7                     | 16  | 110.094 | RA    | 1.1741e-09                   | 1.703E-7 | 16      | 102.096 | RA | 4.38438e-08 | 3.003E-7 |
| 17                           | 116.558 | IR      | 0.098746    | 2.171E-7                     | 17  | 116.262 | IR    | 0.122146                     | 4.334E-7 | 17      | 106.960 | IR | 0.0981516   | 4.870E-7 |
| 18                           | 125.108 | IR      | 0.0340334   | 2.842E-7                     | 18  | 120.492 | IR    | 0.118287                     | 1.231E-7 | 18      | 113.787 | IR | 0.101774    | 6.313E-8 |
| 19                           | 135.847 | RA      | 8.65943e-09 | 2.568E-7                     | 19  | 124.879 | RA    | 2.74591e-08                  | 8.979E-8 | 19      | 115.077 | IR | 0.0537505   | 4.863E-7 |
| 20                           | 145.745 | IR      | 0.0843109   | 8.805E-8                     | 20  | 125.933 | IR    | 0.0311634                    | 2.795E-7 | 20      | 115.669 | RA | 7.66743e-09 | 6.292E-8 |
| 21                           | 147.043 | RA      | 2.57304e-07 | 4.963E-8                     | 21  | 131.801 | RA    | 1.93044e-09                  | 1.043E-7 | 21      | 123.471 | RA | 4.91208e-09 | 1.616E-7 |
| 22                           | 153.477 | RA      | 1.41611e-08 | 9.594E-8                     | 22  | 146.619 | RA    | 4.8419e-10                   | 8.473E-8 | 22      | 132.512 | RA | 4.1744e-10  | 1.081E-7 |
| 23                           | 154.161 | IR      | 0.00478915  | 3.896E-8                     | 23  | 147.894 | IR    | 0.00022307                   | 1.059E-7 | 23      | 137.701 | IR | 0.00659183  | 1.032E-7 |
| 24                           | 157.023 | RA      | 1.67448e-09 | 3.143E-7                     | 24  | 152.115 | RA    | 3.8858e-10                   | 4.251E-8 | 24      | 142.470 | RA | 9.00518e-09 | 9.581E-8 |
| 25                           | 164.811 | IR      | 0.0168672   | 1.544E-7                     | 25  | 156.494 | RA    | 3.46825e-08                  | 3.604E-7 | 25      | 146.251 | IR | 0.0261749   | 1.275E-7 |
| 26                           | 170.864 | IR      | 0.0228392   | 8.523E-8                     | 26  | 156.901 | IR    | 0.0155736                    | 9.248E-8 | 26      | 147.674 | RA | 1.74798e-08 | 3.167E-7 |
| 27                           | 172.283 | RA      | 5.20073e-08 | 7.640E-8                     | 27  | 159.188 | IR    | 0.0501272                    | 9.521E-8 | 27      | 150.326 | IR | 0.0154465   | 1.132E-7 |
| 28                           | 176.786 | RA      | 1.37239e-09 | 7.966E-8                     | 28  | 171.287 | RA    | 4.79582e-10                  | 5.244E-8 | 28      | 152.845 | RA | 3.60875e-09 | 6.060E-8 |
| 29                           | 182.392 | RA      | 4.246e-09   | 1.085E-7                     | 29  | 178.512 | IR    | 0.0103048                    | 5.849E-8 | 29      | 166.038 | IR | 0.00195887  | 4.370E-8 |
| 30                           | 191.142 | IR      | 0.0407331   | 2.090E-7                     | 30  | 179.447 | RA    | 6.50843e-09                  | 5.093E-8 | 30      | 170.613 | RA | 3.40344e-11 | 4.378E-8 |
| 31                           | 191.914 | IR      | 0.00704056  | 2.054E-7                     | 31  | 184.578 | IR    | 0.00895319                   | 2.577E-7 | 31      | 176.841 | IR | 0.0102557   | 1.358E-7 |
| 32                           | 197.706 | IR      | 0.0364393   | 3.643E-7                     | 32  | 190.518 | RA    | 3.93853e-07                  | 5.654E-7 | 32      | 184.088 | RA | 7.13285e-10 | 4.614E-7 |
| 33                           | 198.410 | RA      | 5.03695e-07 | 3.365E-7                     | 33  | 190.580 | IR    | 0.0672073                    | 3.086E-7 | 33      | 185.233 | IR | 0.0500268   | 3.206E-7 |
| 34                           | 214.610 | RA      | 4.10336e-09 | 1.484E-6                     | 34  | 203.046 | IR    | 0.0078023                    | 2.395E-7 | 34      | 191.400 | RA | 3.11997e-09 | 1.035E-7 |
| 35                           | 221.435 | IR      | 0.0289395   | 9.542E-7                     | 35  | 205.520 | RA    | 2.92579e-09                  | 3.848E-7 | 35      | 195.487 | IR | 0.0208491   | 3.419E-7 |
| 36                           | 223.183 | RA      | 1.03994e-08 | 9.031E-7                     | 36  | 210.897 | RA    | 3.72967e-09                  | 6.500E-7 | 36      | 202.043 | RA | 9.46518e-10 | 3.840E-7 |
| 37                           | 226.889 | IR      | 0.0999659   | 1.988E-6                     | 37  | 216.045 | RA    | 1.6324e-09                   | 1.729E-6 | 37      | 209.752 | RA | 9.01762e-10 | 7.126E-7 |
| 38                           | 232.051 | RA      | 2.73578e-08 | 1.202E-6                     | 38  | 218.329 | IR    | 0.0771787                    | 2.982E-6 | 38      | 216.655 | IR | 0.0611255   | 2.870E-6 |
| 39                           | 235.632 | IR      | 0.0110861   | 7.643E-7                     | 39  | 225.085 | RA    | 5.69773e-10                  | 4.600E-7 | 39      | 216.774 | RA | 7.77778e-06 | 1.797E-6 |
| 40                           | 238.610 | IR      | 0.0508659   | 2.508E-6                     | 40  | 233.321 | IR    | 0.03545                      | 2.727E-6 | 40      | 225.294 | IR | 0.0285509   | 2.083E-7 |
| 41                           | 242.644 | RA      | 6.13992e-10 | 1.443E-6                     | 41  | 237.690 | IR    | 0.0372088                    | 7.706E-7 | 41      | 232.769 | IR | 0.0540075   | 3.343E-6 |
| 42                           | 248.507 | RA      | 3.03884e-09 | 8.837E-7                     | 42  | 237.990 | RA    | 3.78922e-09                  | 2.896E-6 | 42      | 234.876 | RA | 8.61177e-08 | 3.177E-6 |
| 43                           | 261.756 | RA      | 1.94294e-09 | 4.008E-7                     | 43  | 259.801 | RA    | 1.14391e-08                  | 3.058E-7 | 43      | 256.280 | IR | 0.0445536   | 6.833E-7 |
| 44                           | 262.168 | IR      | 0.00241313  | 2.946E-7                     | 44  | 259.858 | IR    | 0.0324196                    | 4.775E-7 | 44      | 257.025 | RA | 2.37159e-09 | 2.938E-7 |
| 45                           | 266.121 | IR      | 0.129181    | 1.806E-6                     | 45  | 260.527 | IR    | 0.0759373                    | 1.145E-6 | 45      | 257.512 | IR | 0.00407065  | 2.797E-7 |
| 46                           | 267.209 | IR      | 0.0383872   | 5.459E-7                     | 46  | 262.110 | RA    | 6.45148e-09                  | 1.669E-6 | 46      | 258.013 | RA | 2.78966e-08 | 6.138E-7 |
| 47                           | 267.646 | RA      | 6.10078e-07 | 1.540E-6                     | 47  | 264.081 | IR    | 0.0381919                    | 5.743E-7 | 47      | 262.248 | IR | 0.0661621   | 1.029E-6 |
| 48                           | 278.568 | RA      | 1.07569e-09 | 1.004E-7                     | 48  | 264.431 | RA    | 4.61031e-08                  | 7.493E-8 | 48      | 262.352 | RA | 2.25698e-07 | 9.585E-7 |
| 49                           | 299.488 | IR      | 0.0951757   | 1.396E-6                     | 49  | 291.124 | IR    | 0.124052                     | 1.694E-6 | 49      | 286.495 | IR | 0.137506    | 2.013E-6 |
| 50                           | 307.599 | RA      | 2.21386e-09 | 1.551E-6                     | 50  | 298.739 | RA    | 2.45054e-10                  | 1.717E-6 | 50      | 292.978 | RA | 2.10202e-10 | 1.988E-6 |
| 51                           | 362.124 | IR      | 0.345906    | 1.573E-6                     | 51  | 360.098 | IR    | 0.343246                     | 1.510E-6 | 51      | 360.154 | IR | 0.331754    | 1.527E-6 |
| 52                           | 365.808 | RA      | 5.98087e-09 | 2.254E-6                     | 52  | 363.302 | RA    | 9.96037e-09                  | 2.356E-6 | 52      | 362.357 | RA | 1.98123e-08 | 2.564E-6 |
| 53                           | 370.550 | IR      | 0.0236267   | 2.889E-6                     | 53  | 367.026 | IR    | 0.00930416                   | 3.132E-6 | 53      | 365.217 | IR | 0.010304    | 3.259E-6 |
| 54                           | 372.937 | RA      | 2.78906e-10 | 1.992E-6                     | 54  | 369.740 | RA    | 6.7007e-10                   | 1.940E-6 | 54      | 368.039 | RA | 6.24529e-10 | 1.864E-6 |
| 55                           | 404.792 | IR      | 0.00638653  | 4.832E-8                     | 55  | 404.274 | IR    | 0.00427885                   | 3.692E-8 | 55      | 404.406 | IR | 0.00387183  | 3.153E-8 |
| 56                           | 405.704 | RA      | 1.40575e-08 | 1.382E-8                     | 56  | 404.822 | RA    | 1.56788e-08                  | 3.494E-9 | 56      | 404.502 | RA | 2.68418e-07 | 4.610E-9 |
| 57                           | 420.684 | IR      | 0.118925    | 6.350E-7                     | 57  | 419.717 | IR    | 0.115886                     | 5.391E-7 | 57      | 419.626 | IR | 0.111054    | 5.464E-7 |
| 58                           | 422.250 | RA      | 7.24816e-08 | 6.958E-7                     | 58  | 420.367 | RA    | 4.66749e-07                  | 6.222E-7 | 58      | 420.259 | RA | 9.17834e-08 | 6.117E-7 |
| 59                           | 460.382 | IR      | 0.103504    | 2.155E-6                     | 59  | 455.743 | IR    | 0.0885806                    | 2.161E-6 | 59      | 454.217 | IR | 0.0807651   | 2.161E-6 |
| 60                           | 464.761 | RA      | 5.77817e-10 | 2.299E-6                     | 60  | 460.013 | RA    | 3.79541e-09                  | 2.289E-6 | 60      | 458.066 | RA | 2.05066e-10 | 2.287E-6 |
| 61                           | 474.153 | IR      | 1.20604     | 3.470E-6                     | 61  | 468.580 | IR    | 1.25879                      | 3.621E-6 | 61      | 466.492 | IR | 1.23675     | 3.707E-6 |
| 62                           | 483.878 | RA      | 2.18143e-09 | 3.677E-6                     | 62  | 479.723 | RA    | 6.18163e-10                  | 3.840E-6 | 62      | 476.911 | RA | 7.978e-09   | 3.924E-6 |
| 63                           | 536.986 | IR      | 0.017771    | 7.517E-8                     | 63  | 540.858 | IR    | 0.0130267                    | 7.519E-8 | 63      | 541.228 | IR | 0.0115712   | 6.476E-8 |
| 64                           | 543.112 | RA      | 4.91258e-10 | 7.022E-8                     | 64  | 544.275 | RA    | 3.61066e-11                  | 5.876E-8 | 64      | 543.919 | RA | 1.78257e-10 | 5.375E-8 |
| 65                           | 548.183 | IR      | 0.00463221  | 5.654E-9                     | 65  | 547.075 | IR    | 0.00895865                   | 4.307E-9 | 65      | 547.140 | IR | 0.0072697   | 3.158E-9 |
| 66                           | 548.972 | RA      | 1.48482e-09 | 2.555E-9                     | 66  | 549.520 | RA    | 5.42449e-11                  | 4.758E-9 | 66      | 549.207 | RA | 3.44394e-11 | 1.967E-9 |
| 67                           | 575.367 | RA      | 1.61954e-09 | 5.960E-9                     | 67  | 571.414 | IR    | 0.00421952                   | 1.323E-8 | 67      | 569.910 | IR | 0.00251436  | 7.838E-9 |
| 68                           | 575.913 | IR      | 0.00139236  | 3.853E-9                     | 68  | 572.319 | RA    | 7.59549e-10                  | 1.295E-8 | 68      | 570.358 | RA | 1.02047e-09 | 7.796E-9 |
| 69                           | 604.371 | IR      | 0.255618    | 5.990E-7                     | 69  | 600.870 | IR    | 0.216155                     | 5.797E-7 | 69      | 598.911 | IR | 0.215597    | 5.974E-7 |
| 70                           | 606.982 | RA      | 1.19296e-10 | 6.019E-7                     | 70  | 602.671 | RA    | 3.75203e-09                  | 5.942E-7 | 70      | 600.666 | RA | 5.72882e-09 | 6.102E-7 |
| 71                           | 648.631 | IR      | 0.0193893   | 1.245E-7                     | 71  | 648.634 | IR    | 0.0299205                    | 1.481E-7 | 71      | 649.770 | IR | 0.017256    | 1.014E-7 |
| 72                           | 650.156 | RA      | 1.32074e-08 | 1.373E-7                     | 72  | 650.569 | IR    | 0.0340785                    | 2.248E-7 | 72      | 651.041 | IR | 0.0434422   | 2.683E-7 |

|     |          |    |             |          |     |          |    |             |          |     |          |    |             |          |
|-----|----------|----|-------------|----------|-----|----------|----|-------------|----------|-----|----------|----|-------------|----------|
| 73  | 650.513  | IR | 0.0427074   | 1.983E-7 | 73  | 652.863  | RA | 7.63423e-10 | 3.026E-7 | 73  | 652.641  | RA | 5.95104e-10 | 3.135E-7 |
| 74  | 653.981  | RA | 6.4949e-09  | 1.559E-7 | 74  | 653.845  | RA | 5.11941e-11 | 2.672E-8 | 74  | 653.602  | RA | 2.83636e-10 | 1.720E-8 |
| 75  | 678.241  | RA | 7.84943e-11 | 7.079E-7 | 75  | 673.688  | RA | 5.40983e-09 | 6.370E-7 | 75  | 672.178  | RA | 1.43499e-08 | 6.783E-7 |
| 76  | 680.556  | IR | 0.255485    | 6.022E-7 | 76  | 674.832  | IR | 0.210839    | 5.123E-7 | 76  | 673.748  | IR | 0.225122    | 5.553E-7 |
| 77  | 684.168  | IR | 0.011226    | 3.055E-7 | 77  | 681.210  | IR | 0.0496708   | 3.769E-7 | 77  | 678.588  | IR | 0.0267721   | 3.368E-7 |
| 78  | 685.792  | RA | 2.04802e-09 | 2.849E-7 | 78  | 682.162  | RA | 1.41083e-09 | 3.396E-7 | 78  | 679.614  | RA | 9.32955e-11 | 3.006E-7 |
| 79  | 806.882  | IR | 0.0724555   | 3.436E-8 | 79  | 801.662  | IR | 0.0687535   | 3.930E-8 | 79  | 797.634  | IR | 0.0656518   | 3.650E-8 |
| 80  | 807.874  | RA | 3.29677e-06 | 1.363E-8 | 80  | 802.210  | RA | 4.0551e-08  | 1.649E-8 | 80  | 797.813  | RA | 5.29758e-07 | 1.546E-8 |
| 81  | 824.896  | IR | 0.167381    | 3.563E-8 | 81  | 812.944  | IR | 0.137611    | 2.891E-8 | 81  | 810.675  | IR | 0.126061    | 2.822E-8 |
| 82  | 826.085  | RA | 4.07331e-07 | 3.382E-8 | 82  | 814.401  | RA | 2.95462e-08 | 1.993E-8 | 82  | 811.541  | RA | 2.00638e-08 | 2.367E-8 |
| 83  | 933.082  | IR | 0.04976     | 1.904E-8 | 83  | 932.924  | RA | 1.6486e-07  | 1.039E-7 | 83  | 931.214  | RA | 2.04377e-08 | 9.323E-8 |
| 84  | 934.233  | RA | 1.80486e-05 | 8.996E-8 | 84  | 933.007  | IR | 0.0250772   | 8.661E-8 | 84  | 931.278  | IR | 0.0163319   | 5.245E-8 |
| 85  | 934.301  | IR | 0.0889706   | 2.901E-7 | 85  | 934.272  | IR | 0.115405    | 1.866E-7 | 85  | 932.763  | IR | 0.117445    | 2.284E-7 |
| 86  | 935.405  | RA | 5.55405e-08 | 1.772E-7 | 86  | 935.338  | RA | 2.02795e-09 | 1.037E-7 | 86  | 933.549  | RA | 2.5826e-09  | 1.411E-7 |
| 87  | 941.657  | IR | 0.100162    | 1.959E-7 | 87  | 935.746  | IR | 0.0493726   | 2.277E-7 | 87  | 935.568  | IR | 0.051768    | 2.337E-7 |
| 88  | 941.810  | RA | 1.77867e-07 | 1.908E-7 | 88  | 937.822  | RA | 5.90178e-11 | 2.470E-7 | 88  | 937.058  | RA | 1.2154e-09  | 1.911E-7 |
| 89  | 945.553  | RA | 1.44078e-07 | 2.848E-7 | 89  | 939.732  | RA | 2.16701e-08 | 2.535E-7 | 89  | 938.673  | RA | 5.29647e-08 | 2.632E-7 |
| 90  | 945.826  | IR | 0.102302    | 1.893E-7 | 90  | 940.038  | IR | 0.0999759   | 1.738E-7 | 90  | 939.130  | IR | 0.0900945   | 1.526E-7 |
| 91  | 997.163  | RA | 1.50785e-08 | 8.506E-6 | 91  | 1000.742 | RA | 5.26222e-10 | 8.319E-6 | 91  | 999.858  | RA | 1.72929e-08 | 8.338E-6 |
| 92  | 997.631  | IR | 0.0399555   | 1.295E-6 | 92  | 1001.872 | IR | 0.191185    | 3.224E-6 | 92  | 1001.160 | IR | 0.0365619   | 1.109E-6 |
| 93  | 1000.957 | IR | 0.796356    | 8.655E-6 | 93  | 1002.603 | IR | 0.610095    | 3.181E-6 | 93  | 1002.844 | IR | 0.796057    | 7.384E-6 |
| 94  | 1003.876 | RA | 7.14566e-09 | 7.658E-7 | 94  | 1005.739 | IR | 0.171442    | 3.310E-6 | 94  | 1005.060 | IR | 0.0531896   | 1.021E-6 |
| 95  | 1007.821 | IR | 0.112295    | 1.266E-7 | 95  | 1006.923 | RA | 8.22972e-11 | 3.859E-7 | 95  | 1006.004 | RA | 4.35763e-11 | 3.096E-7 |
| 96  | 1013.269 | RA | 4.36423e-07 | 3.356E-8 | 96  | 1011.082 | RA | 5.43189e-10 | 1.110E-7 | 96  | 1010.913 | RA | 6.82764e-10 | 2.124E-7 |
| 97  | 1014.056 | IR | 0.107557    | 1.993E-7 | 97  | 1011.997 | IR | 0.0412148   | 1.547E-8 | 97  | 1011.729 | IR | 0.0665485   | 6.118E-8 |
| 98  | 1014.784 | RA | 1.38735e-07 | 3.304E-7 | 98  | 1013.710 | RA | 3.47201e-10 | 8.650E-8 | 98  | 1012.239 | RA | 9.12332e-09 | 1.472E-7 |
| 99  | 1015.711 | IR | 0.0346709   | 2.947E-8 | 99  | 1014.332 | RA | 6.11686e-09 | 5.616E-7 | 99  | 1014.151 | IR | 0.0385216   | 6.333E-7 |
| 100 | 1016.549 | RA | 5.73844e-09 | 5.885E-7 | 100 | 1014.833 | IR | 0.0431644   | 4.908E-7 | 100 | 1014.163 | RA | 1.62183e-07 | 4.780E-7 |
| 101 | 1018.734 | IR | 0.00483498  | 2.417E-7 | 101 | 1016.008 | IR | 0.0372231   | 2.748E-7 | 101 | 1015.589 | IR | 0.0443421   | 2.862E-7 |
| 102 | 1019.930 | RA | 3.38397e-08 | 2.926E-7 | 102 | 1017.671 | RA | 2.21068e-10 | 6.963E-7 | 102 | 1017.017 | RA | 1.31692e-09 | 8.189E-7 |
| 103 | 1022.947 | IR | 0.0821304   | 9.367E-8 | 103 | 1019.948 | IR | 0.133537    | 1.052E-7 | 103 | 1018.931 | IR | 0.110751    | 1.386E-7 |
| 104 | 1023.574 | RA | 6.96194e-08 | 4.093E-8 | 104 | 1020.294 | RA | 1.82752e-08 | 1.475E-7 | 104 | 1018.935 | RA | 4.02648e-05 | 7.516E-8 |
| 105 | 1027.274 | IR | 0.0534552   | 1.849E-7 | 105 | 1022.683 | IR | 0.0338383   | 1.942E-7 | 105 | 1021.913 | IR | 0.0438113   | 1.870E-7 |
| 106 | 1027.729 | RA | 1.8879e-07  | 2.396E-7 | 106 | 1024.485 | RA | 4.42101e-10 | 4.741E-7 | 106 | 1023.443 | RA | 1.96321e-10 | 4.532E-7 |
| 107 | 1029.187 | IR | 0.047155    | 4.214E-8 | 107 | 1027.409 | IR | 0.0237977   | 1.354E-7 | 107 | 1027.004 | IR | 0.0285083   | 7.274E-8 |
| 108 | 1032.462 | RA | 3.41338e-09 | 4.497E-8 | 108 | 1029.281 | RA | 4.32922e-10 | 1.273E-7 | 108 | 1028.590 | RA | 1.16858e-09 | 4.104E-8 |
| 109 | 1187.200 | IR | 0.00686606  | 1.783E-8 | 109 | 1182.955 | IR | 0.0066375   | 1.498E-8 | 109 | 1181.911 | IR | 0.00614484  | 1.548E-8 |
| 110 | 1188.392 | RA | 2.76196e-09 | 8.231E-9 | 110 | 1183.921 | RA | 4.50919e-11 | 6.070E-9 | 110 | 1182.726 | RA | 5.71022e-11 | 7.109E-9 |
| 111 | 1194.633 | IR | 0.0203137   | 4.122E-8 | 111 | 1187.669 | IR | 0.0239093   | 4.556E-8 | 111 | 1186.775 | IR | 0.0232716   | 4.288E-8 |
| 112 | 1195.105 | RA | 9.40222e-07 | 4.381E-8 | 112 | 1188.217 | RA | 1.82926e-09 | 4.907E-8 | 112 | 1187.336 | RA | 3.01665e-10 | 4.542E-8 |
| 113 | 1288.207 | RA | 1.52309e-08 | 3.005E-8 | 113 | 1281.433 | RA | 1.86738e-10 | 3.016E-8 | 113 | 1279.819 | RA | 5.59243e-10 | 2.931E-8 |
| 114 | 1290.855 | IR | 0.30865     | 2.654E-8 | 114 | 1283.654 | IR | 0.302599    | 2.300E-8 | 114 | 1282.180 | IR | 0.302961    | 2.315E-8 |
| 115 | 1294.384 | RA | 2.62571e-09 | 8.713E-9 | 115 | 1287.009 | RA | 1.21751e-10 | 1.087E-8 | 115 | 1285.911 | RA | 3.29892e-11 | 1.168E-8 |
| 116 | 1297.518 | IR | 0.0144768   | 9.810E-9 | 116 | 1290.885 | IR | 0.0210566   | 1.320E-8 | 116 | 1288.952 | IR | 0.0204898   | 1.313E-8 |
| 117 | 1346.097 | RA | 3.64855e-08 | 2.579E-9 | 117 | 1348.487 | RA | 2.12425e-10 | 4.888E-9 | 117 | 1349.334 | RA | 3.48816e-09 | 4.287E-9 |
| 118 | 1351.558 | IR | 0.388836    | 3.260E-8 | 118 | 1350.103 | IR | 0.468375    | 4.751E-8 | 118 | 1350.512 | IR | 0.436124    | 4.416E-8 |
| 119 | 1360.046 | RA | 8.34929e-08 | 1.319E-8 | 119 | 1357.440 | IR | 0.0237268   | 1.604E-8 | 119 | 1357.443 | IR | 0.0223553   | 1.404E-8 |
| 120 | 1360.716 | IR | 0.0292593   | 1.929E-8 | 120 | 1358.480 | RA | 4.20755e-10 | 1.563E-8 | 120 | 1357.930 | RA | 1.22209e-09 | 1.296E-8 |
| 121 | 1362.377 | IR | 0.0365405   | 2.946E-9 | 121 | 1361.034 | IR | 0.0557964   | 9.472E-9 | 121 | 1360.546 | IR | 0.0371884   | 9.293E-9 |
| 122 | 1370.302 | RA | 3.7814e-10  | 9.134E-9 | 122 | 1365.396 | RA | 1.45129e-10 | 8.974E-9 | 122 | 1365.585 | RA | 1.79737e-10 | 7.479E-9 |
| 123 | 1372.767 | RA | 4.45359e-09 | 3.334E-9 | 123 | 1368.694 | IR | 0.0207626   | 7.809E-9 | 123 | 1369.221 | RA | 1.27339e-09 | 2.142E-8 |
| 124 | 1374.784 | IR | 0.0398089   | 8.164E-9 | 124 | 1369.515 | RA | 3.27039e-10 | 2.663E-8 | 124 | 1369.386 | IR | 0.0212602   | 8.359E-9 |
| 125 | 1378.058 | RA | 4.90594e-08 | 3.217E-8 | 125 | 1372.610 | IR | 0.0424665   | 1.421E-8 | 125 | 1373.265 | IR | 0.0499414   | 1.886E-8 |
| 126 | 1381.429 | IR | 0.0896561   | 6.519E-9 | 126 | 1374.567 | RA | 2.07373e-10 | 6.853E-9 | 126 | 1373.494 | RA | 1.21373e-08 | 1.121E-8 |
| 127 | 1384.681 | RA | 2.50782e-08 | 2.672E-7 | 127 | 1379.334 | RA | 5.63455e-11 | 2.726E-7 | 127 | 1380.122 | RA | 9.58987e-10 | 2.867E-7 |
| 128 | 1386.276 | IR | 0.622979    | 2.276E-7 | 128 | 1383.494 | IR | 0.537896    | 2.167E-7 | 128 | 1383.334 | IR | 0.535913    | 2.255E-7 |
| 129 | 1411.738 | IR | 0.515631    | 3.299E-8 | 129 | 1414.155 | IR | 0.625517    | 2.583E-8 | 129 | 1415.400 | IR | 0.635917    | 2.806E-8 |
| 130 | 1422.711 | RA | 7.73378e-09 | 2.223E-8 | 130 | 1421.912 | RA | 4.00316e-10 | 7.905E-9 | 130 | 1423.182 | RA | 5.67202e-10 | 5.688E-9 |
| 131 | 1427.750 | IR | 0.117887    | 1.028E-8 | 131 | 1422.988 | IR | 0.0743813   | 1.090E-8 | 131 | 1423.604 | IR | 0.0228707   | 7.665E-9 |
| 132 | 1428.689 | IR | 0.160107    | 2.018E-8 | 132 | 1426.402 | RA | 4.37814e-11 | 2.311E-8 | 132 | 1425.176 | RA | 6.86207e-11 | 2.660E-8 |
| 133 | 1430.373 | RA | 1.98635e-09 | 1.999E-8 | 133 | 1429.381 | IR | 0.109937    | 1.238E-8 | 133 | 1428.631 | IR | 0.100581    | 1.211E-8 |
| 134 | 1436.946 | IR | 0.0192226   | 6.545E-9 | 134 | 1438.142 | IR | 0.0329663   | 3.172E-9 | 134 | 1437.660 | RA | 1.2147e-09  | 1.556E-8 |
| 135 | 1439.499 | RA | 1.13278e-09 | 1.880E-8 | 135 | 1440.524 | RA | 3.33782e-11 | 1.457E-8 | 135 | 1437.957 | IR | 0.032662    | 3.358E-9 |
| 136 | 1446.695 | RA | 7.51618e-09 | 2.238E-9 | 136 | 1443.750 | RA | 2.07075e-10 | 3.991E-9 | 136 | 1442.552 | RA | 7.99518e-10 | 5.104E-9 |
| 137 | 1447.346 | IR | 0.0247034   | 1.736E-8 | 137 | 1444.558 | IR | 0.0289408   | 1.076E-8 | 137 | 1443.724 | IR | 0.038336    | 8.271E-9 |
| 138 | 1451.251 | RA | 2.4592e-09  | 1.583E-9 | 138 | 1448.016 | IR | 0.0524794   | 1.579E-8 | 138 | 1447.087 | IR | 0.0403361   | 1.386E-8 |
| 139 | 1455.902 | IR | 0.0545879   | 2.682E-9 | 139 | 1449.135 | RA | 4.24519e-10 | 1.806E-9 | 139 | 1447.935 | RA | 2.3485e-11  | 1.893E-9 |
| 140 | 1457.802 | RA | 1.01536e-08 | 1.096E-8 | 140 | 1452.422 | RA | 5.68649e-11 | 1.310E-8 | 140 | 1451.571 | RA | 4.60836e-11 | 7.330E-9 |
| 141 | 1459.155 | IR | 0.0247834   | 4.499E-8 | 141 | 1456.951 | IR | 0.0203876   | 2.820E-8 | 141 | 1456.499 | IR | 0.0161374   | 5.389E-8 |
| 142 | 1462.833 | IR | 0.0581313   | 1.943E-8 | 142 | 1458.962 | RA | 1.1648e-10  | 7.596E-9 | 142 | 1456.630 | RA | 1.99182e-10 | 7.488E-9 |
| 143 | 1463.086 | RA | 2.70235e-06 | 6.790E-9 | 143 | 1459.939 | IR | 0.0363434   | 1.733E-8 | 143 | 1457.804 | IR | 0.0331246   | 2.391E-9 |
| 144 | 1469.852 | RA | 1.40281e-09 | 5.166E-8 | 144 | 1462.136 | RA | 1.41314e-10 | 4.178E-8 | 144 | 1461.027 | RA | 1.0522e-10  | 4.853E-8 |
| 145 | 1523.527 | RA | 3.33511e-07 | 8.469E-8 | 145 | 1517.201 | RA | 8.15059e-11 | 7.183E-8 | 145 | 1517.858 | RA | 2.34833e-09 | 7.171E-8 |
| 146 | 1524.718 | IR | 1.62786     | 8.583E-8 | 146 | 1521.722 | IR | 1.56251     | 7.710E-8 | 146 | 152      |    |             |          |

|     |          |    |             |            |     |          |    |             |            |     |          |    |             |            |
|-----|----------|----|-------------|------------|-----|----------|----|-------------|------------|-----|----------|----|-------------|------------|
| 152 | 1563.036 | IR | 0.0467863   | 3.438E-7   | 152 | 1560.816 | IR | 0.0547118   | 3.569E-7   | 152 | 1560.852 | IR | 0.0525904   | 3.713E-7   |
| 153 | 2984.609 | RA | 5.82463e-07 | 1.576E-010 | 153 | 2987.477 | IR | 0.0314729   | 6.862E-011 | 153 | 2984.984 | IR | 0.02508     | 1.074E-010 |
| 154 | 2984.836 | IR | 0.0373476   | 8.844E-011 | 154 | 2987.614 | RA | 5.40876e-09 | 1.583E-010 | 154 | 2986.748 | RA | 4.31484e-12 | 2.470E-010 |
| 155 | 2987.178 | IR | 0.0354518   | 4.113E-010 | 155 | 2989.751 | IR | 0.027779    | 3.763E-010 | 155 | 2988.618 | RA | 1.52361e-11 | 2.115E-010 |
| 156 | 2987.338 | RA | 8.05954e-08 | 2.855E-010 | 156 | 2990.494 | RA | 3.71615e-10 | 2.708E-010 | 156 | 2989.806 | IR | 0.0231198   | 3.906E-010 |
| 157 | 3003.416 | RA | 1.88664e-11 | 1.629E-010 | 157 | 2994.141 | RA | 8.65443e-11 | 1.757E-010 | 157 | 2990.776 | RA | 2.16912e-12 | 1.612E-010 |
| 158 | 3008.649 | IR | 0.00602421  | 1.575E-010 | 158 | 2996.398 | IR | 0.00809659  | 1.424E-010 | 158 | 2992.997 | IR | 0.00761636  | 1.279E-010 |
| 159 | 3022.784 | IR | 0.0214359   | 6.555E-011 | 159 | 3007.206 | IR | 0.0127427   | 9.826E-011 | 159 | 3006.536 | IR | 0.0134931   | 1.335E-010 |
| 160 | 3022.798 | RA | 9.88563e-05 | 1.228E-010 | 160 | 3007.336 | RA | 1.51399e-09 | 9.204E-011 | 160 | 3006.651 | RA | 1.23586e-11 | 1.354E-010 |
| 161 | 3077.354 | IR | 0.00816996  | 2.033E-010 | 161 | 3071.540 | RA | 4.17023e-12 | 7.330E-011 | 161 | 3068.363 | RA | 1.07272e-10 | 7.217E-011 |
| 162 | 3078.320 | RA | 2.00665e-09 | 1.258E-010 | 162 | 3071.975 | IR | 0.0101648   | 1.379E-010 | 162 | 3068.828 | IR | 0.00968949  | 1.361E-010 |
| 163 | 3079.200 | RA | 6.99323e-09 | 3.136E-011 | 163 | 3074.971 | RA | 1.3102e-11  | 1.636E-011 | 163 | 3072.223 | RA | 1.89979e-11 | 2.025E-011 |
| 164 | 3080.333 | IR | 0.0285368   | 1.275E-010 | 164 | 3076.782 | IR | 0.03712     | 1.268E-010 | 164 | 3073.876 | IR | 0.0284894   | 1.303E-010 |
| 165 | 3098.381 | RA | 2.96741e-08 | 2.515E-010 | 165 | 3088.761 | RA | 1.14497e-07 | 1.116E-010 | 165 | 3085.901 | RA | 9.87027e-10 | 1.066E-010 |
| 166 | 3098.432 | IR | 0.00609919  | 2.007E-010 | 166 | 3088.770 | IR | 0.0123451   | 1.479E-010 | 166 | 3085.974 | IR | 0.0107032   | 7.115E-011 |
| 167 | 3104.466 | IR | 0.00484697  | 1.333E-010 | 167 | 3094.222 | IR | 0.00280017  | 1.627E-010 | 167 | 3089.976 | IR | 0.00414112  | 1.318E-010 |
| 168 | 3104.715 | RA | 1.69719e-07 | 1.165E-010 | 168 | 3094.315 | RA | 7.55871e-10 | 1.488E-010 | 168 | 3090.099 | RA | 4.13466e-09 | 1.151E-010 |
| 169 | 3132.334 | RA | 2.77076e-07 | 1.886E-011 | 169 | 3122.378 | RA | 2.44764e-09 | 2.255E-011 | 169 | 3119.604 | RA | 2.05927e-10 | 2.091E-011 |
| 170 | 3132.517 | IR | 0.0063204   | 3.671E-012 | 170 | 3122.530 | IR | 0.0053411   | 5.737E-012 | 170 | 3119.770 | IR | 0.00467375  | 4.427E-012 |
| 171 | 3134.004 | RA | 1.42754e-08 | 1.184E-011 | 171 | 3124.077 | RA | 4.12205e-10 | 7.871E-012 | 171 | 3122.671 | RA | 6.22569e-10 | 9.876E-012 |
| 172 | 3134.449 | IR | 0.00530281  | 3.087E-011 | 172 | 3124.339 | IR | 0.0041218   | 3.117E-011 | 172 | 3122.865 | IR | 0.00381488  | 2.561E-011 |
| 173 | 3153.093 | RA | 3.47523e-08 | 3.727E-011 | 173 | 3139.376 | RA | 1.94498e-10 | 2.989E-010 | 173 | 3134.794 | RA | 2.5466e-10  | 1.086E-010 |
| 174 | 3153.765 | IR | 0.0142862   | 4.449E-011 | 174 | 3140.031 | IR | 0.0153815   | 2.744E-010 | 174 | 3135.445 | IR | 0.0137782   | 1.183E-010 |
| 175 | 3161.440 | RA | 6.17076e-07 | 8.247E-011 | 175 | 3148.231 | RA | 8.64978e-09 | 1.681E-010 | 175 | 3142.252 | RA | 6.51733e-11 | 1.774E-010 |
| 176 | 3161.592 | IR | 0.00200373  | 9.412E-011 | 176 | 3148.297 | IR | 0.00173749  | 1.864E-010 | 176 | 3142.327 | IR | 0.00190462  | 1.869E-010 |
| 177 | 3178.047 | RA | 1.88405e-07 | 2.996E-010 | 177 | 3170.090 | RA | 1.90442e-07 | 3.189E-010 | 177 | 3171.188 | RA | 2.64077e-08 | 2.298E-010 |
| 178 | 3178.086 | IR | 0.0165278   | 1.997E-010 | 178 | 3170.092 | IR | 0.00314695  | 2.587E-010 | 178 | 3171.214 | IR | 0.00912243  | 1.253E-010 |
| 179 | 3179.699 | IR | 0.00280711  | 9.664E-011 | 179 | 3172.046 | RA | 5.98174e-10 | 1.701E-010 | 179 | 3172.421 | IR | 0.00253928  | 2.275E-010 |
| 180 | 3179.717 | RA | 0.000103368 | 2.087E-010 | 180 | 3172.072 | IR | 0.0103645   | 8.885E-011 | 180 | 3172.431 | RA | 2.42535e-07 | 2.532E-010 |



## Comparison of experimental and simulation data plots

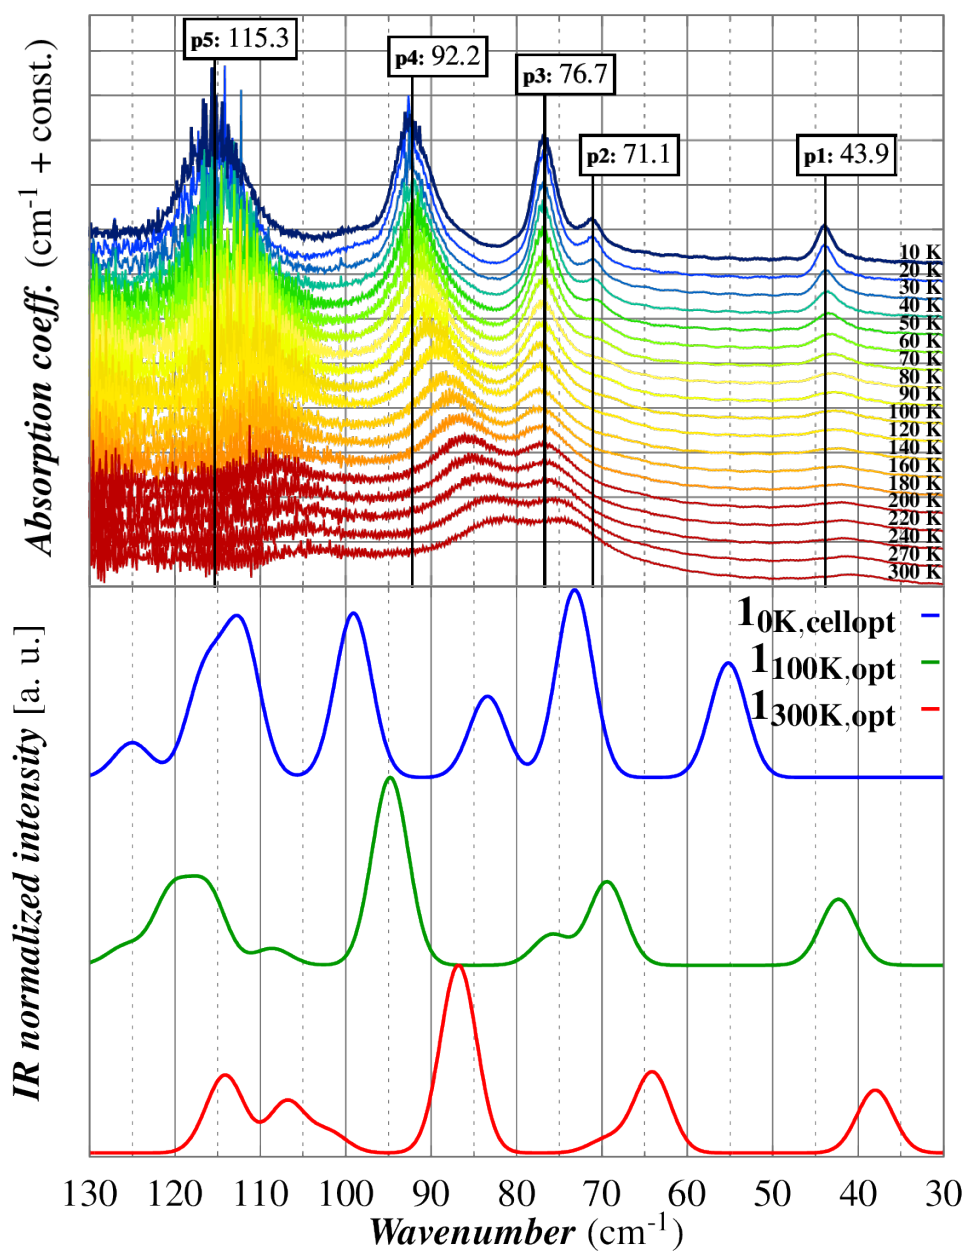

FIG. S 5 Top panel: THz spectra of (2) as a function of temperature. Bottom panel: DFT vibrational analysis of 10K,cellopt 100K,opt and 300K,opt.

FIG. S 6 Normal modes composition in IR peaks 1 and 2

**p1**

**p2**

Cell opt

Cell opt

n° 6; 55.32 cm<sup>-1</sup>

n° 8; 73.27 cm<sup>-1</sup>

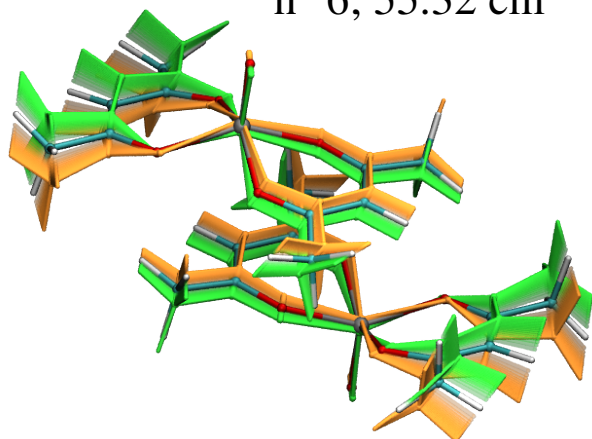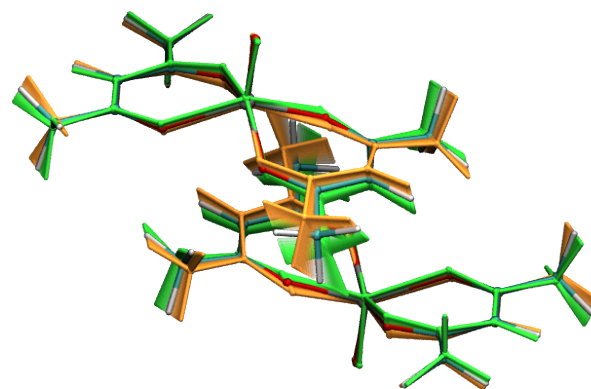

Geo opt 100K

Geo opt 100K

n° 4; 42.41 cm<sup>-1</sup>

n° 9; 69.51 cm<sup>-1</sup>

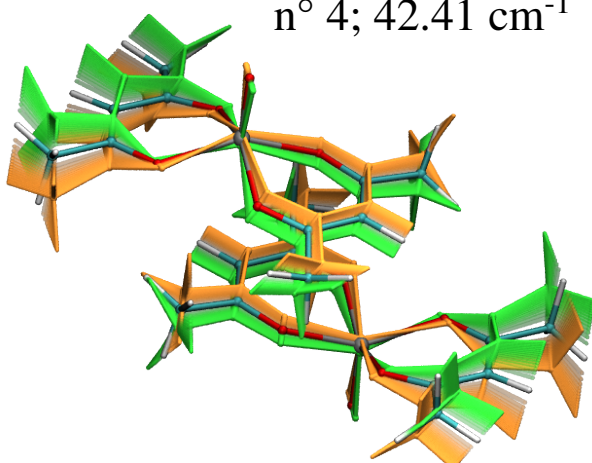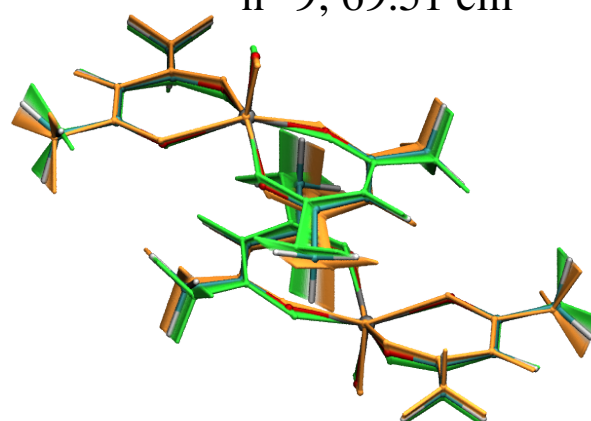

Geo opt 300K

Geo opt 300K

n° 4; 38.14 cm<sup>-1</sup>

n° 9; 64.17 cm<sup>-1</sup>

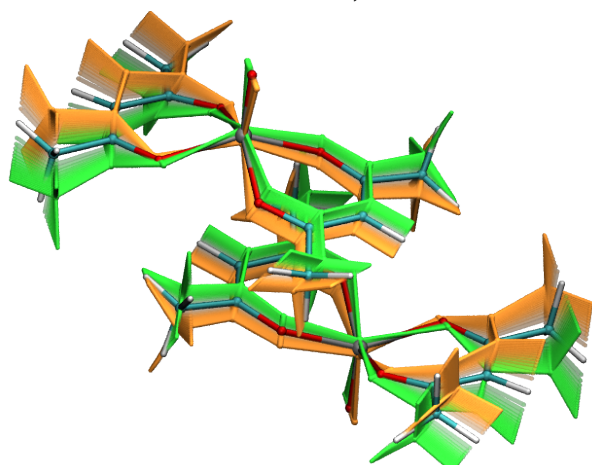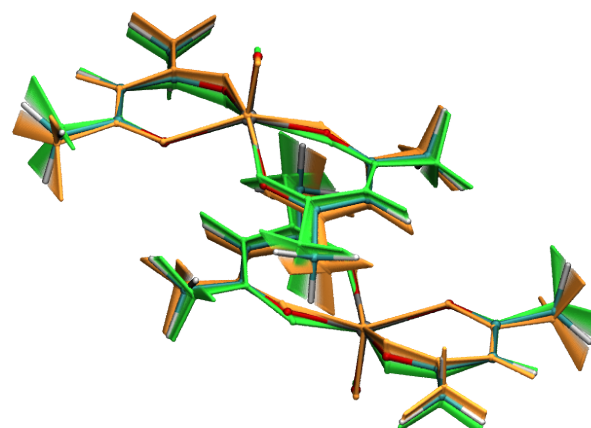

FIG. S 7 Normal modes composition in IR peaks 3 and 4

**p3**

**p4**

Cell opt

Cell opt

n° 11; 83.46 cm<sup>-1</sup>

n° 13; 99.24 cm<sup>-1</sup>

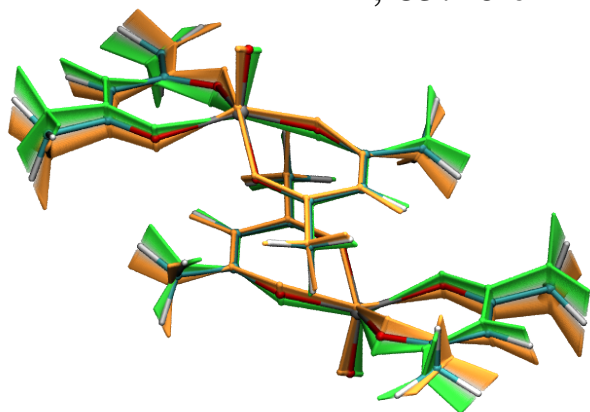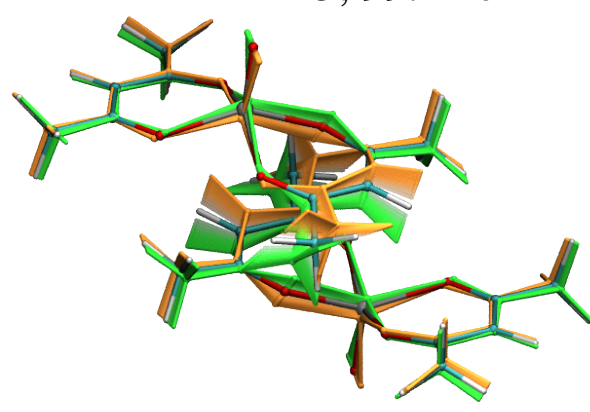

Geo opt 100K

Geo opt 100K

n° 10; 76.01 cm<sup>-1</sup>

n° 12; 94.86 cm<sup>-1</sup>

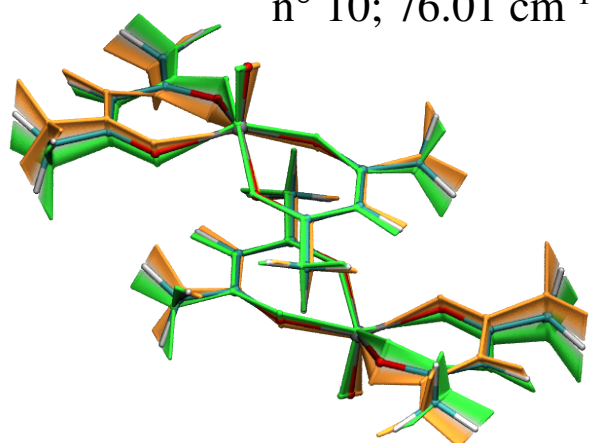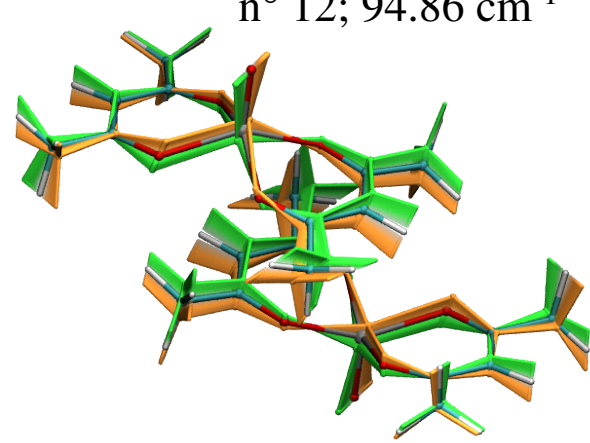

Geo opt 300K

Geo opt 300K

n° 10; 69.46 cm<sup>-1</sup>

n° 12; 86.91 cm<sup>-1</sup>

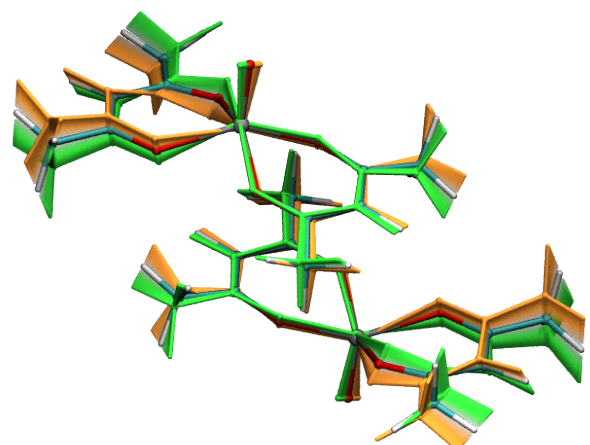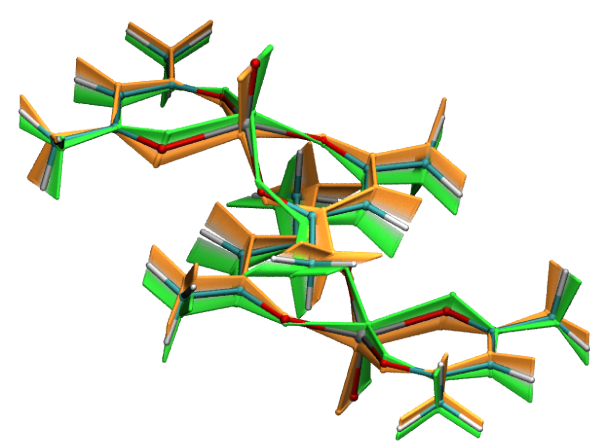

FIG. S 8 Normal modes composition in IR peaks 5

**p5**

Cell opt

n° 15; 112.35 cm<sup>-1</sup>

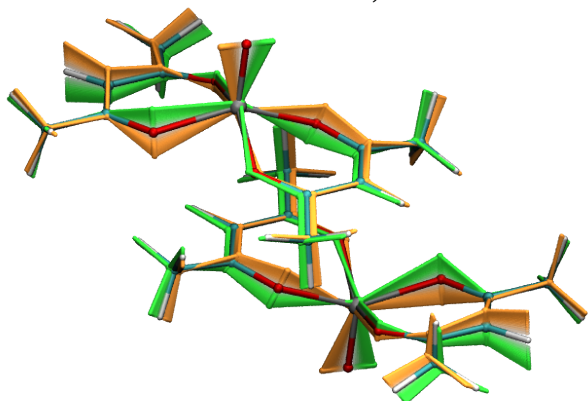

Cell opt

n° 17; 116.56 cm<sup>-1</sup>

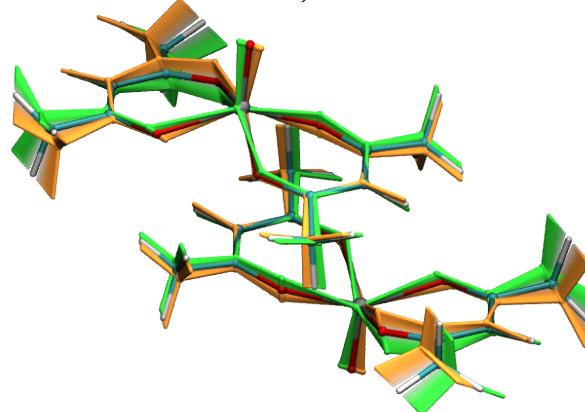

Geo opt 100K

n° 15; 108.69 cm<sup>-1</sup>

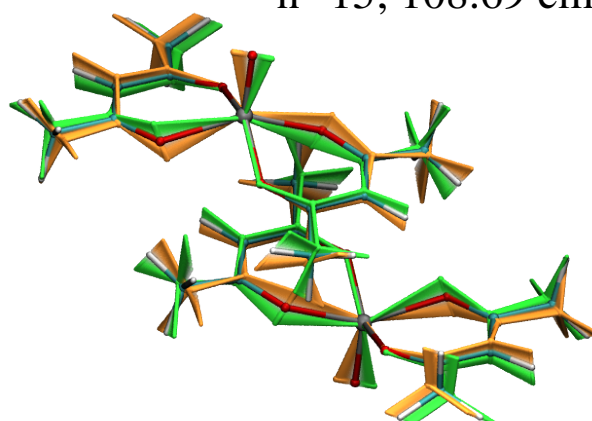

Geo opt 300K

n° 15; 102.07 cm<sup>-1</sup>

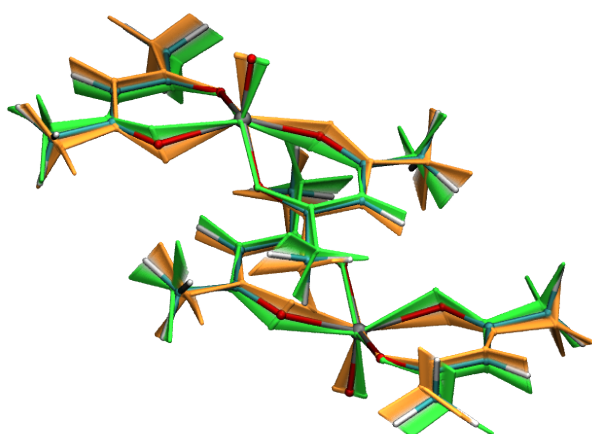

Geo opt 300K

n° 17; 106.96 cm<sup>-1</sup>

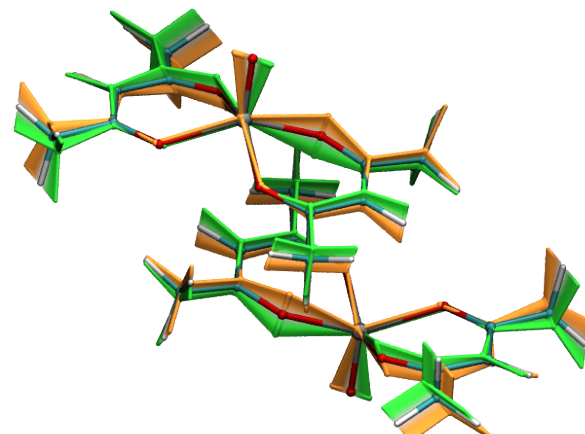

FIG. S 9 Normal modes composition in IR peaks 6

**p6**

Cell opt

n° 18; 125.11 cm<sup>-1</sup>

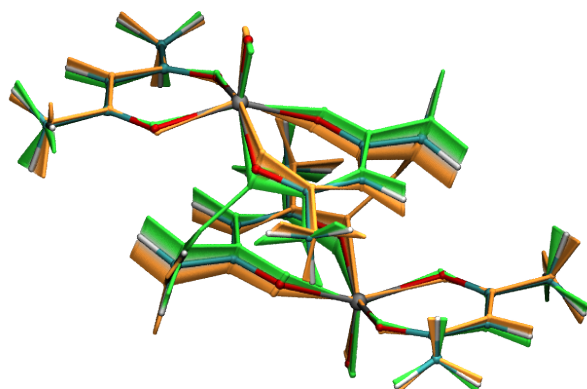

Geo opt 100K

n° 17; 116.26 cm<sup>-1</sup>

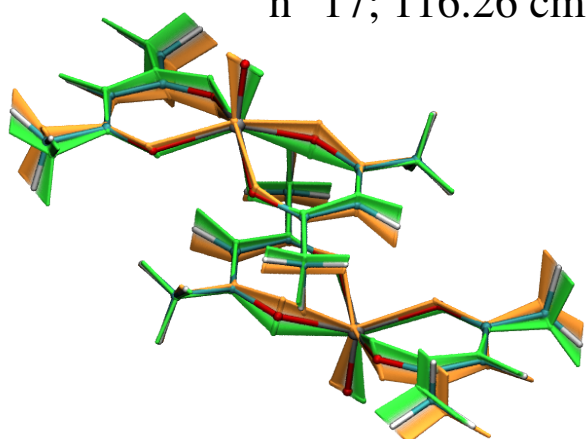

Geo opt 100K

n° 18; 120.49 cm<sup>-1</sup>

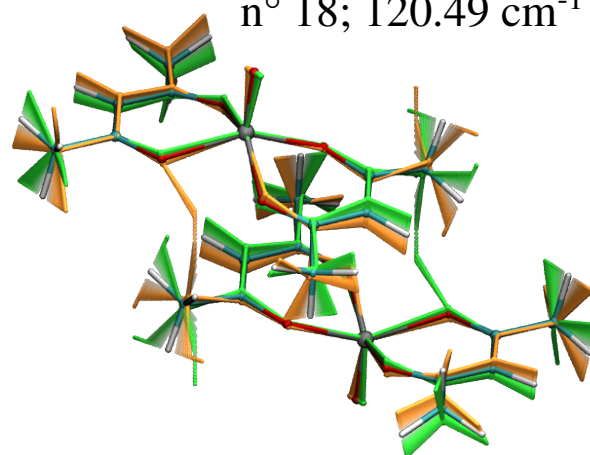

Geo opt 300K

n° 18; 113.79 cm<sup>-1</sup>

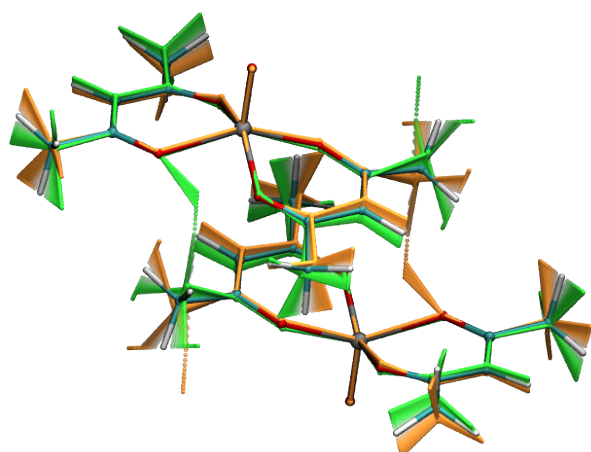

Geo opt 300K

n° 19; 115.08 cm<sup>-1</sup>

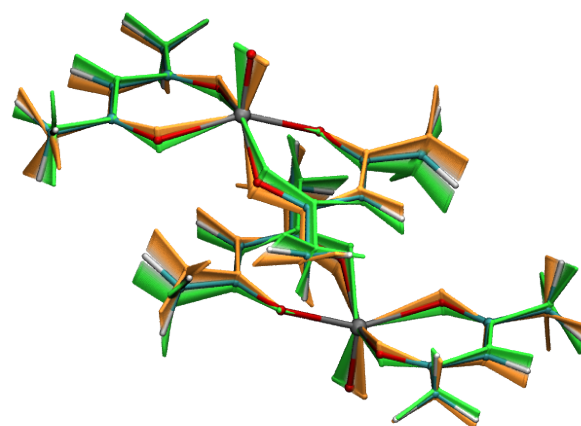

TAB. S 5 Charge variation of one molecule of  $[VO(acac)_2]$  crystal is analysed along several normal modes from  $\mathbf{10K}_{\text{cellopt}}$  structure. The metal center and first coordination sphere atomic charges are reported.  $\alpha$  is the normal mode index,  $\omega_\alpha$  is the frequency,  $q_\alpha$  represents the progress along the normal coordinate.

| $\alpha$ | $\omega_\alpha$ | Simm.          | Sp-Ph                | $q_\alpha$ | V      | $O_{\text{vanadyl}}$ | $O_{\text{acac}}$ | $O_{\text{acac}}$ | $O_{\text{acac}}$ | $O_{\text{acac}}$ |
|----------|-----------------|----------------|----------------------|------------|--------|----------------------|-------------------|-------------------|-------------------|-------------------|
| –        | –               | –              | –                    | 0.0        | 0.7052 | -0.3686              | -0.3011           | -0.2890           | -0.2829           | -0.2932           |
| 6        | 55.32           | IR - <b>p1</b> | $2.33 \cdot 10^{-7}$ | 1.0        | 0.7053 | -0.3691              | -0.3013           | -0.2886           | -0.2832           | -0.2925           |
| 8        | 73.27           | IR - <b>p2</b> | $2.33 \cdot 10^{-7}$ | 1.0        | 0.7054 | -0.3678              | -0.3003           | -0.2904           | -0.2834           | -0.2939           |
| 9        | 75.29           | Raman          | $2.36 \cdot 10^{-7}$ | 1.0        | 0.7067 | -0.3689              | -0.3012           | -0.2899           | -0.2829           | -0.2920           |
| 11       | 83.46           | IR - <b>p3</b> | $2.45 \cdot 10^{-7}$ | 1.0        | 0.7038 | -0.3688              | -0.3022           | -0.2888           | -0.2832           | -0.2924           |
| 45       | 266.12          | IR             | $1.81 \cdot 10^{-6}$ | 1.0        | 0.7096 | -0.3718              | -0.3004           | -0.2909           | -0.2815           | -0.2960           |
| 62       | 483.88          | Raman          | $3.68 \cdot 10^{-6}$ | 1.0        | 0.7022 | -0.3679              | -0.3050           | -0.2938           | -0.2785           | -0.2882           |
| 93       | 1000.96         | IR             | $8.66 \cdot 10^{-6}$ | 1.0        | 0.6949 | -0.3438              | -0.3021           | -0.2907           | -0.2839           | -0.2958           |

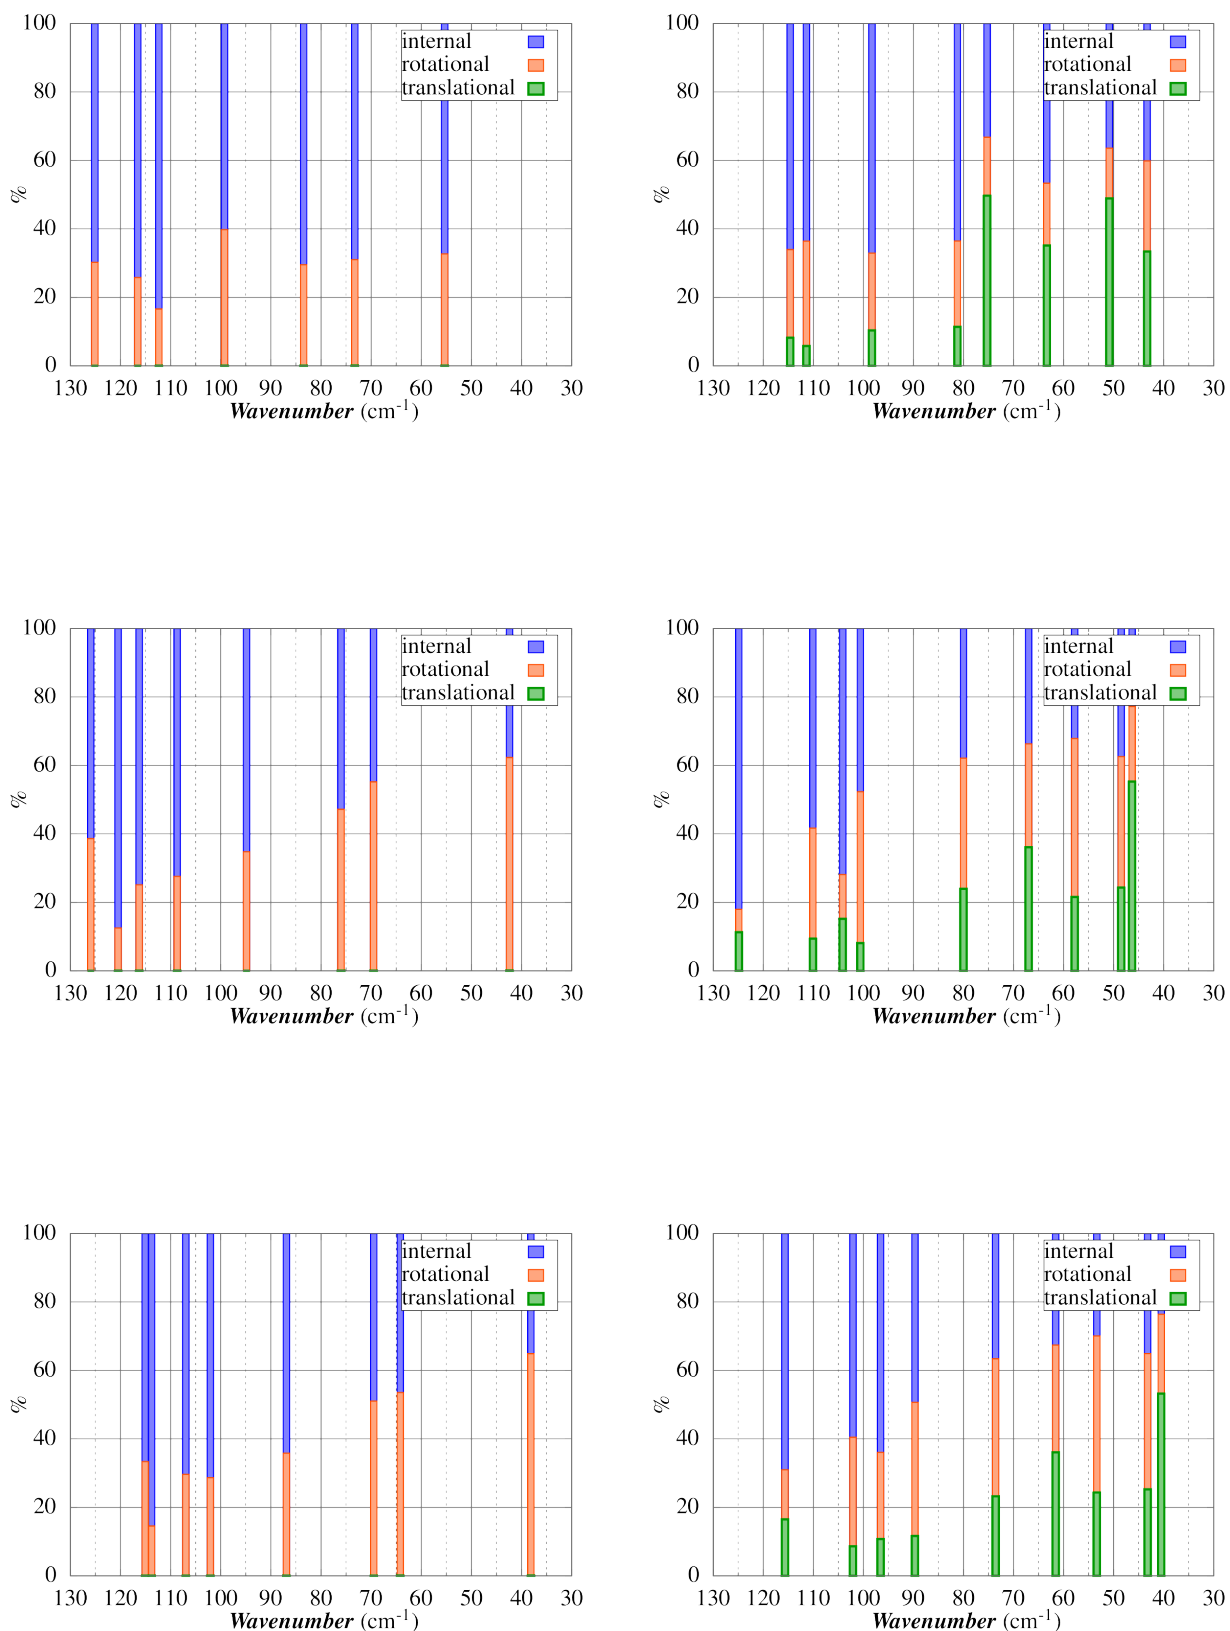

FIG. S 10 Total motion of a single molecule associated with IR (left) and Raman (right) normal modes, from the top  $10\text{K}_{\text{cellopt}}$ ,  $100\text{K}_{\text{opt}}$  and  $300\text{K}_{\text{opt}}$  sets. The modes were decomposed in intramolecular percentage (blue), rotational percentage (orange), and translational percentage (green).

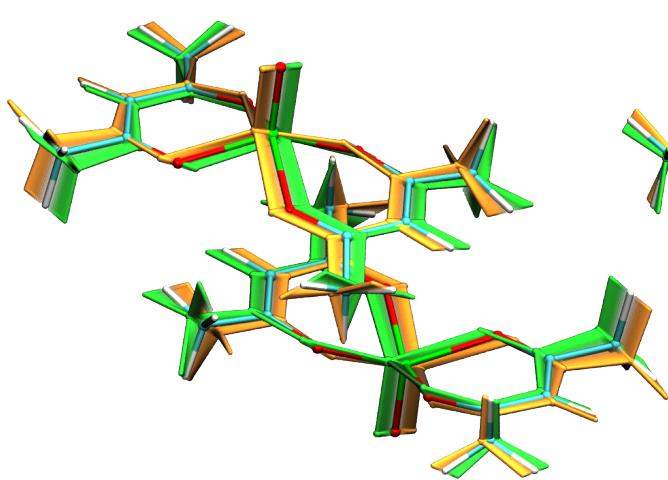

Mode n° 8

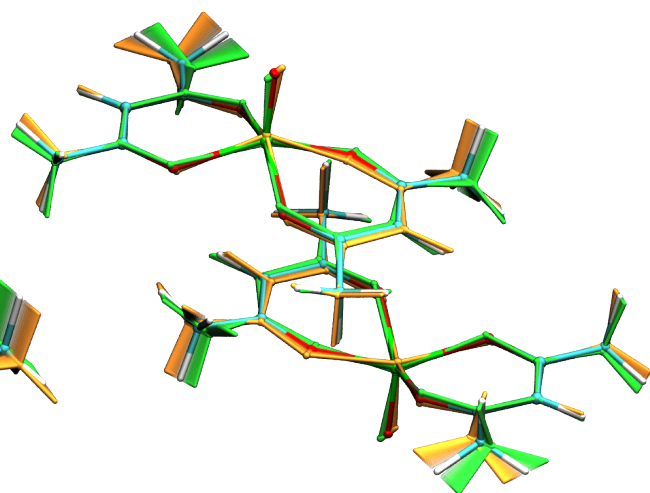

Mode n° 45

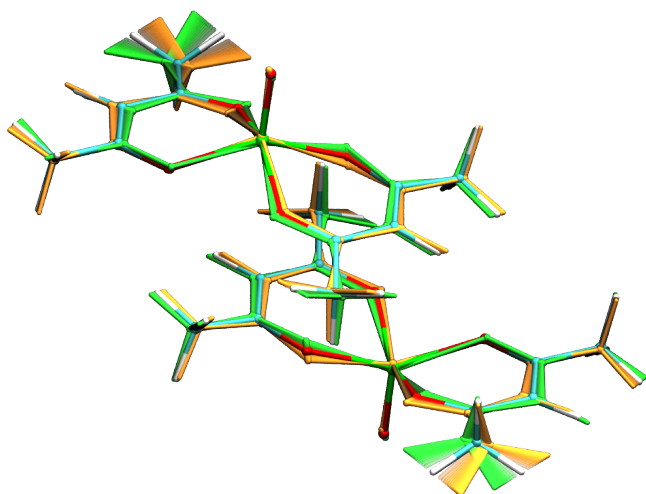

Mode n° 47

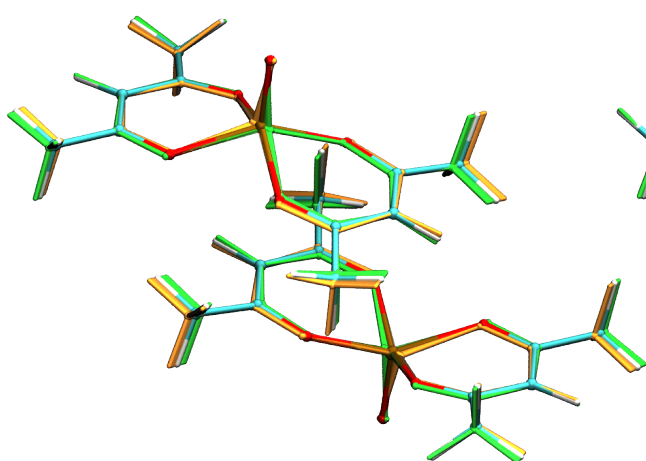

Mode n° 62

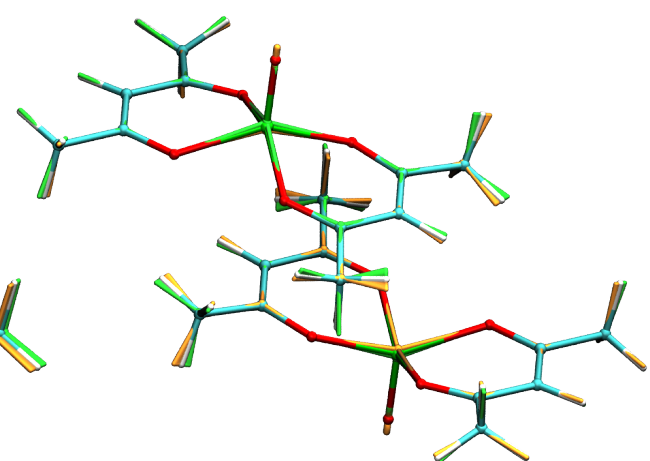

Mode n° 91

FIG. S 11 Normal modes 8, 45, 62, and 91 from  $\mathbf{1}_{100\text{K,opt}}$  structure are depicted. 45, 62, and 91 show the largest charges variation and the largest Sp-Ph coupling.



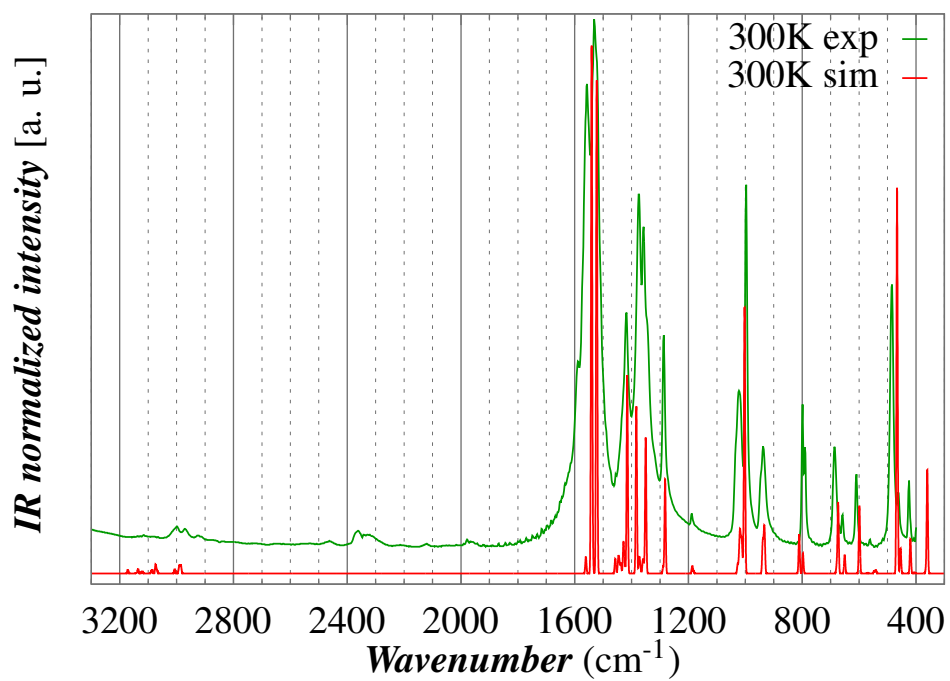

FIG. S 12 400-4000 cm-1 IR measured spectrum (green), simulated 300K spectrum (red)
